# Supplementary material for: Effect of prenatal micronutrient-fortified balanced energy-protein supplementation on maternal and newborn body composition: A sub-study from the MISAME-III randomized controlled efficacy trial in rural Burkina Faso
Source: PubMed Central journal article supplement (PMC10406330; doi:10.1371/journal.pmed.1004242), 2023-07-24
Supplement: pmed.1004242.s008.pdf [file pmed.1004242.s008.pdf]

## CONSORT checklist of the manuscript

| Section/Topic                    | Item No | Checklist item                                                                                                                                                                              | Reported on page No                             |
|----------------------------------|---------|---------------------------------------------------------------------------------------------------------------------------------------------------------------------------------------------|-------------------------------------------------|
| <b>Title and abstract</b>        |         |                                                                                                                                                                                             |                                                 |
|                                  | 1a      | Identification as a randomised trial in the title                                                                                                                                           | <u>yes</u>                                      |
|                                  | 1b      | Structured summary of trial design, methods, results, and conclusions (for specific guidance see CONSORT for abstracts)                                                                     | <u>Par. 2, 3 &amp; 4</u>                        |
| <b>Introduction</b>              |         |                                                                                                                                                                                             |                                                 |
| Background and objectives        | 2a      | Scientific background and explanation of rationale                                                                                                                                          | <u>Par 1- 3</u>                                 |
|                                  | 2b      | Specific objectives or hypotheses                                                                                                                                                           | <u>Par 3</u>                                    |
| <b>Methods</b>                   |         |                                                                                                                                                                                             |                                                 |
| Trial design                     | 3a      | Description of trial design (such as parallel, factorial) including allocation ratio                                                                                                        | <u>Par. 1 &amp; 2</u>                           |
|                                  | 3b      | Important changes to methods after trial commencement (such as eligibility criteria), with reasons                                                                                          | <u>NA</u>                                       |
| Participants                     | 4a      | Eligibility criteria for participants                                                                                                                                                       | <u>Par. 4</u>                                   |
|                                  | 4b      | Settings and locations where the data were collected                                                                                                                                        | <u>Par. 2</u>                                   |
| Interventions                    | 5       | The interventions for each group with sufficient details to allow replication, including how and when they were actually administered                                                       | <u>Par 1, 3</u>                                 |
| Outcomes                         | 6a      | Completely defined pre-specified primary and secondary outcome measures, including how and when they were assessed                                                                          | <u>Par 6-9</u>                                  |
|                                  | 6b      | Any changes to trial outcomes after the trial commenced, with reasons                                                                                                                       | <u>NA</u>                                       |
| Sample size                      | 7a      | How sample size was determined                                                                                                                                                              | <u>Par 9</u>                                    |
|                                  | 7b      | When applicable, explanation of any interim analyses and stopping guidelines                                                                                                                | <u>NA</u>                                       |
| Randomisation:                   |         |                                                                                                                                                                                             |                                                 |
| Sequence generation              | 8a      | Method used to generate the random allocation sequence                                                                                                                                      | <u>Par 2 &amp; 3</u>                            |
|                                  | 8b      | Type of randomisation; details of any restriction (such as blocking and block size)                                                                                                         | <u>Par 2 &amp; 3<br/>(citation for details)</u> |
| Allocation concealment mechanism | 9       | Mechanism used to implement the random allocation sequence (such as sequentially numbered containers), describing any steps taken to conceal the sequence until interventions were assigned | <u>Par 2 &amp; 3<br/>(citation for details)</u> |
| Implementation                   | 10      | Who generated the random allocation sequence, who enrolled participants, and who assigned participants to                                                                                   | <u>Par 2 &amp; 3</u>                            |

|                                                      |     |                                                                                                                                                   |                                 |
|------------------------------------------------------|-----|---------------------------------------------------------------------------------------------------------------------------------------------------|---------------------------------|
|                                                      |     | interventions                                                                                                                                     | (citation for details)<br>Par 4 |
| Blinding                                             | 11a | If done, who was blinded after assignment to interventions (for example, participants, care providers, those assessing outcomes) and how          | Par 2 (citation for details)    |
|                                                      | 11b | If relevant, description of the similarity of interventions                                                                                       | NA                              |
| Statistical methods                                  | 12a | Statistical methods used to compare groups for primary and secondary outcomes                                                                     | Par 11 & 12                     |
|                                                      | 12b | Methods for additional analyses, such as subgroup analyses and adjusted analyses                                                                  | Par 11 & 12                     |
| <b>Results</b>                                       |     |                                                                                                                                                   |                                 |
| Participant flow (a diagram is strongly recommended) | 13a | For each group, the numbers of participants who were randomly assigned, received intended treatment, and were analysed for the primary outcome    | Fig 1 & Par 1                   |
|                                                      | 13b | For each group, losses and exclusions after randomisation, together with reasons                                                                  | Fig 1 & Par 1                   |
| Recruitment                                          | 14a | Dates defining the periods of recruitment and follow-up                                                                                           | In the methods:<br>Par 4        |
|                                                      | 14b | Why the trial ended or was stopped                                                                                                                | NA                              |
| Baseline data                                        | 15  | A table showing baseline demographic and clinical characteristics for each group                                                                  | Table 1 & S1                    |
| Numbers analysed                                     | 16  | For each group, number of participants (denominator) included in each analysis and whether the analysis was by original assigned groups           | Fig 1, par 1                    |
| Outcomes and estimation                              | 17a | For each primary and secondary outcome, results for each group, and the estimated effect size and its precision (such as 95% confidence interval) | Par 2                           |
|                                                      | 17b | For binary outcomes, presentation of both absolute and relative effect sizes is recommended                                                       | NA                              |
| Ancillary analyses                                   | 18  | Results of any other analyses performed, including subgroup analyses and adjusted analyses, distinguishing pre-specified from exploratory         | Par 3 & 4                       |
| Harms                                                | 19  | All important harms or unintended effects in each group (for specific guidance see CONSORT for harms)                                             | NA                              |
| <b>Discussion</b>                                    |     |                                                                                                                                                   |                                 |
| Limitations                                          | 20  | Trial limitations, addressing sources of potential bias, imprecision, and, if relevant, multiplicity of analyses                                  | Par 7                           |
| Generalisability                                     | 21  | Generalisability (external validity, applicability) of the trial findings                                                                         | Par 2-5                         |
| Interpretation                                       | 22  | Interpretation consistent with results, balancing benefits and harms, and considering other relevant evidence                                     | Par 2-5                         |
| <b>Other information</b>                             |     |                                                                                                                                                   |                                 |
| Registration                                         | 23  | Registration number and name of trial registry                                                                                                    | Methods: Par 3                  |
| Protocol                                             | 24  | Where the full trial protocol can be accessed, if available                                                                                       | Methods: Par 2                  |
| Funding                                              | 25  | Sources of funding and other support (such as supply of drugs), role of funders                                                                   | Cover page                      |
